# Supplementary material
Source: PubMed Central journal article supplement (PMC10587788)
Supplement: jamaophthalmol-e233785-s002.pdf [file jamaophthalmol-e233785-s002.pdf]

## **Data Sharing Statement**

Muni. In-Office Suprachoroidal Viscopexy for Rhegmatogenous Retinal Detachment Repair.  
*JAMA Ophthalmol.* Published August 24, 2023. doi:10.1001/jamaophthalmol.2023.3785

### **Data**

**Data available:** No
